# Supplementary material
Source: publisher figshare collection journal article supplement (https://acs.figshare.com/ndownloader/files/4678750)
Supplement: Supplementary file 1 [file 4678750]

## **SUPPORTING INFORMATION**

### **Syntheses, Solution Multi-NMR Characterization, and Reactivities of $[\text{C}_6\text{F}_5\text{Xe}]^+$ Salts of Weakly Coordinating Borate Anions $[\text{BY}_4]^-$ ( $\text{Y} = \text{CF}_3, \text{C}_6\text{F}_5, \text{CN}, \text{OTeF}_5$ )**

**Karsten Koppe, Vural Bilir, Hermann-J. Frohn,\* Hélène P. A. Mercier, Gary J. Schrobilgen\***

Anorganische Chemie, Universität Duisburg-Essen, Lotharstrasse 1, D-47048 Duisburg, Germany;

Department of Chemistry, McMaster University, Hamilton, Ontario L8S 4M1, Canada.

**Table S1.** Solubilities (20 °C) of [C<sub>6</sub>F<sub>5</sub>Xe][BY<sub>4</sub>] (Y = CN, CF<sub>3</sub>, and C<sub>6</sub>F<sub>5</sub>) and [C<sub>6</sub>F<sub>5</sub>Xe][BF<sub>4</sub>]

| [C <sub>6</sub> F <sub>5</sub> Xe] <sup>+</sup> salt                        | solvent                                                 | solubility, mmol mL <sup>-1</sup> |
|-----------------------------------------------------------------------------|---------------------------------------------------------|-----------------------------------|
| [B(CF <sub>3</sub> ) <sub>4</sub> ] <sup>-</sup>                            | CH <sub>3</sub> CN                                      | ≥ 4.5                             |
|                                                                             | PFB                                                     | ≥ 1.2                             |
|                                                                             | CH <sub>2</sub> Cl <sub>2</sub>                         | ~0.06                             |
| [B(C <sub>6</sub> F <sub>5</sub> ) <sub>4</sub> ] <sup>-</sup> <sup>a</sup> | CH <sub>3</sub> CN                                      | ~0.5                              |
|                                                                             | DCE                                                     | ~0.2                              |
|                                                                             | CH <sub>2</sub> Cl <sub>2</sub>                         | < 0.05                            |
| [B(CN) <sub>4</sub> ] <sup>-</sup>                                          | CH <sub>3</sub> CN                                      | ~4.3                              |
|                                                                             | DCE, CH <sub>2</sub> Cl <sub>2</sub> , PFB              | insoluble                         |
|                                                                             | SO <sub>2</sub> ClF                                     | insoluble                         |
| [BF <sub>4</sub> ] <sup>-</sup>                                             | CH <sub>3</sub> CN                                      | ~4.8                              |
|                                                                             | CH <sub>2</sub> Cl <sub>2</sub> , PFB, CCl <sub>4</sub> | insoluble                         |
|                                                                             | SO <sub>2</sub> ClF                                     | insoluble                         |

<sup>a</sup> This salt contains the [C<sub>6</sub>F<sub>5</sub>Xe--NCCH<sub>3</sub>]<sup>+</sup> cation.

**Table S2.** Solution Decomposition Rates and Products (20 °C) for [C<sub>6</sub>F<sub>5</sub>Xe][BY<sub>4</sub>] (Y = CF<sub>3</sub>, C<sub>6</sub>F<sub>5</sub>, CN, OTeF<sub>5</sub>) and [C<sub>6</sub>F<sub>5</sub>Xe][BF<sub>4</sub>]

| [C <sub>6</sub> F <sub>5</sub> Xe] <sup>+</sup><br>salts        | solvent                         | time,<br>days | % conversion <sup>a</sup> | C <sub>6</sub> F <sub>5</sub> -containing products, % |                                                                                                                                        | remarks           |
|-----------------------------------------------------------------|---------------------------------|---------------|---------------------------|-------------------------------------------------------|----------------------------------------------------------------------------------------------------------------------------------------|-------------------|
|                                                                 |                                 |               |                           | C <sub>6</sub> F <sub>5</sub> H                       | C <sub>6</sub> F <sub>5</sub> X                                                                                                        |                   |
| [B(CF <sub>3</sub> ) <sub>4</sub> ] <sup>−</sup>                | CH <sub>3</sub> CN              | 0.083(3)      | 0                         | —                                                     | —                                                                                                                                      |                   |
|                                                                 |                                 | 2             | 5                         | 100                                                   | —                                                                                                                                      |                   |
|                                                                 |                                 | 11            | 14                        | 100                                                   | —                                                                                                                                      | HF (trace)        |
|                                                                 |                                 | 30            | 57                        | 100                                                   | —                                                                                                                                      | HF                |
|                                                                 |                                 | 43            | 100                       | 100                                                   | —                                                                                                                                      | HF                |
|                                                                 | CH <sub>2</sub> Cl <sub>2</sub> | 0.010(3)      | 0                         | —                                                     | —                                                                                                                                      |                   |
|                                                                 |                                 | 3             | 4                         | —                                                     | C <sub>6</sub> F <sub>5</sub> Cl (100)                                                                                                 |                   |
|                                                                 |                                 | 13            | 28                        | 21                                                    | C <sub>6</sub> F <sub>5</sub> Cl (79)                                                                                                  |                   |
|                                                                 | PFB                             | 22            | 50                        | 20                                                    | C <sub>6</sub> F <sub>5</sub> Cl (80)                                                                                                  |                   |
|                                                                 |                                 | 0.010(3)      | 0                         | —                                                     | C <sub>6</sub> F <sub>5</sub> Cl (100)                                                                                                 |                   |
| [B(C <sub>6</sub> F <sub>5</sub> ) <sub>4</sub> ] <sup>−d</sup> | CH <sub>3</sub> CN              | 8             | 4                         | —                                                     | C <sub>6</sub> F <sub>6</sub> (6), C <sub>6</sub> F <sub>5</sub> X(31), <sup>b</sup> C <sub>6</sub> F <sub>5</sub> Y (63) <sup>c</sup> |                   |
|                                                                 |                                 | 2             | 11                        | 100                                                   | —                                                                                                                                      |                   |
|                                                                 |                                 | 6             | 44                        | 80                                                    | (C <sub>6</sub> F <sub>5</sub> ) <sub>2</sub> (20)                                                                                     |                   |
|                                                                 |                                 | 9             | 74                        | 77                                                    | (C <sub>6</sub> F <sub>5</sub> ) <sub>2</sub> (23)                                                                                     |                   |
|                                                                 | CH <sub>2</sub> Cl <sub>2</sub> | 20            | 100                       | 85                                                    | (C <sub>6</sub> F <sub>5</sub> ) <sub>2</sub> (15)                                                                                     |                   |
|                                                                 |                                 | 0.031(3)      | —                         | —                                                     | —                                                                                                                                      | −40 °C            |
|                                                                 |                                 | 0.083(3)      | 1                         | 100                                                   | —                                                                                                                                      | −40 °C            |
|                                                                 | DCE                             | 0.667(6)      | 4                         | 100                                                   | —                                                                                                                                      | −40 °C            |
|                                                                 |                                 | 0.010(3)      | 28                        | 100                                                   | —                                                                                                                                      |                   |
|                                                                 |                                 | 0.021(3)      | 57                        | 100                                                   | —                                                                                                                                      |                   |
| [B(CN) <sub>4</sub> ] <sup>−</sup>                              | CH <sub>3</sub> CN              | 0.042(3)      | 85                        | 100                                                   | —                                                                                                                                      |                   |
|                                                                 |                                 | 0.021(3)      | 0                         | —                                                     | —                                                                                                                                      |                   |
|                                                                 |                                 | 2             | 2                         | 100                                                   | —                                                                                                                                      |                   |
|                                                                 |                                 | 8             | 6                         | 100                                                   | —                                                                                                                                      | } <sup>e</sup>    |
|                                                                 |                                 | 28            | 21                        | 100                                                   | —                                                                                                                                      |                   |
|                                                                 |                                 | 58            | 94                        | 100                                                   | —                                                                                                                                      |                   |
| [B(OTeF <sub>5</sub> ) <sub>4</sub> ] <sup>−</sup>              | CH <sub>3</sub> CN              | 71            | 100                       | 100                                                   | —                                                                                                                                      |                   |
|                                                                 |                                 | 0.010(3)      | 11                        | 100                                                   | —                                                                                                                                      |                   |
|                                                                 |                                 | 2             | 29                        | 100                                                   | —                                                                                                                                      |                   |
|                                                                 |                                 | 10            | 39                        | 100                                                   | —                                                                                                                                      |                   |
|                                                                 | CH <sub>2</sub> Cl <sub>2</sub> | 25            | 72                        | 94                                                    | (6) <sup>f</sup>                                                                                                                       |                   |
|                                                                 |                                 | 0.021(3)      | 11                        | 100                                                   | —                                                                                                                                      |                   |
| [BF <sub>4</sub> ] <sup>−</sup>                                 | CH <sub>3</sub> CN              | 2             | 66                        | 89                                                    | C <sub>6</sub> F <sub>5</sub> Cl (6)                                                                                                   | (5%) <sup>f</sup> |
|                                                                 |                                 | 9             | 69                        | 90                                                    | C <sub>6</sub> F <sub>5</sub> Cl (7)                                                                                                   | (5%) <sup>f</sup> |
|                                                                 |                                 | 24            | 81                        | 81                                                    | C <sub>6</sub> F <sub>5</sub> Cl (14)                                                                                                  | (5%) <sup>f</sup> |
|                                                                 |                                 | 0.083(3)      | 2                         | 100                                                   | —                                                                                                                                      |                   |
|                                                                 |                                 | 2             | 5                         | 100                                                   | —                                                                                                                                      | HF (trace)        |
|                                                                 | aHF                             | 11            | 10                        | 100                                                   | —                                                                                                                                      | HF (trace)        |
|                                                                 |                                 | 30            | 32                        | 100                                                   | —                                                                                                                                      | HF (trace)        |
|                                                                 |                                 | 43            | 48                        | 100                                                   | —                                                                                                                                      | HF (trace)        |
|                                                                 |                                 | 58            | 79                        | 100                                                   | —                                                                                                                                      | HF (trace)        |
|                                                                 |                                 | 0.500(6)      | 0                         | —                                                     | C <sub>6</sub> F <sub>6</sub> (trace)                                                                                                  |                   |

**Table S2.** (continued ...)

|                                                                                        |                                 |          |     |      |                                          |                                           |
|----------------------------------------------------------------------------------------|---------------------------------|----------|-----|------|------------------------------------------|-------------------------------------------|
| [B(CF <sub>3</sub> ) <sub>4</sub> ] <sup>−</sup> +<br>[BF <sub>4</sub> ] <sup>−g</sup> | CD <sub>3</sub> CN              | 2        | 1   | –    | C <sub>6</sub> F <sub>6</sub> (100)      |                                           |
|                                                                                        |                                 | 11       | 6   | –    | C <sub>6</sub> F <sub>6</sub> (100)      |                                           |
|                                                                                        |                                 | 33       | 12  | –    | C <sub>6</sub> F <sub>6</sub> (100)      |                                           |
|                                                                                        |                                 | 54       | 15  | –    | C <sub>6</sub> F <sub>6</sub> (100)      |                                           |
|                                                                                        |                                 | 0.125(6) | 24  | 100  | –                                        |                                           |
|                                                                                        | CD <sub>2</sub> Cl <sub>2</sub> | 2        | 100 | ~100 | C <sub>6</sub> F <sub>5</sub> D (traces) |                                           |
|                                                                                        |                                 | 0.125(6) | 0   | –    | –                                        |                                           |
|                                                                                        |                                 | 2        | 30  | 50   | C <sub>6</sub> F <sub>5</sub> D (23)     | C <sub>6</sub> F <sub>5</sub> Cl<br>(27%) |
|                                                                                        |                                 | 7        | 41  | 66   | C <sub>6</sub> F <sub>5</sub> D (12)     | C <sub>6</sub> F <sub>5</sub> Cl<br>(22%) |
|                                                                                        |                                 | 18       | 100 | 64   | C <sub>6</sub> F <sub>5</sub> D (18)     | C <sub>6</sub> F <sub>5</sub> Cl<br>(18%) |

<sup>a</sup> Conversion of the [C<sub>6</sub>F<sub>5</sub>Xe]<sup>+</sup> cation and relative molar amounts of C<sub>6</sub>F<sub>5</sub>-containing products in mole %. <sup>b</sup> Unassigned C<sub>6</sub>F<sub>5</sub>-species; δ(<sup>19</sup>F), ppm: *o*-F, −143.0; *p*-F, −154.7; *m*-F, −163.1. <sup>c</sup> Unassigned C<sub>6</sub>F<sub>5</sub>-species; δ(<sup>19</sup>F), ppm: *o*-F, −143.1; *p*-F, −155.2; *m*-F, −162.5. <sup>d</sup> This salt contains the [C<sub>6</sub>F<sub>5</sub>Xe--NCCH<sub>3</sub>]<sup>+</sup> cation. <sup>e</sup> Unassigned <sup>19</sup>F NMR resonances (singlets) also occurred at −144.9 ppm and −181.3 ppm. <sup>f</sup> C<sub>6</sub>F<sub>5</sub>OTeF<sub>5</sub>; δ(<sup>19</sup>F), ppm: *o*-F, −130.6; *p*-F, −141.4; *m*-F, −162.7. <sup>g</sup> Equimolar amounts of [C<sub>6</sub>F<sub>5</sub>Xe][B(CF<sub>3</sub>)<sub>4</sub>] and [N(C<sub>4</sub>H<sub>9</sub>)<sub>4</sub>][BF<sub>4</sub>] were used.

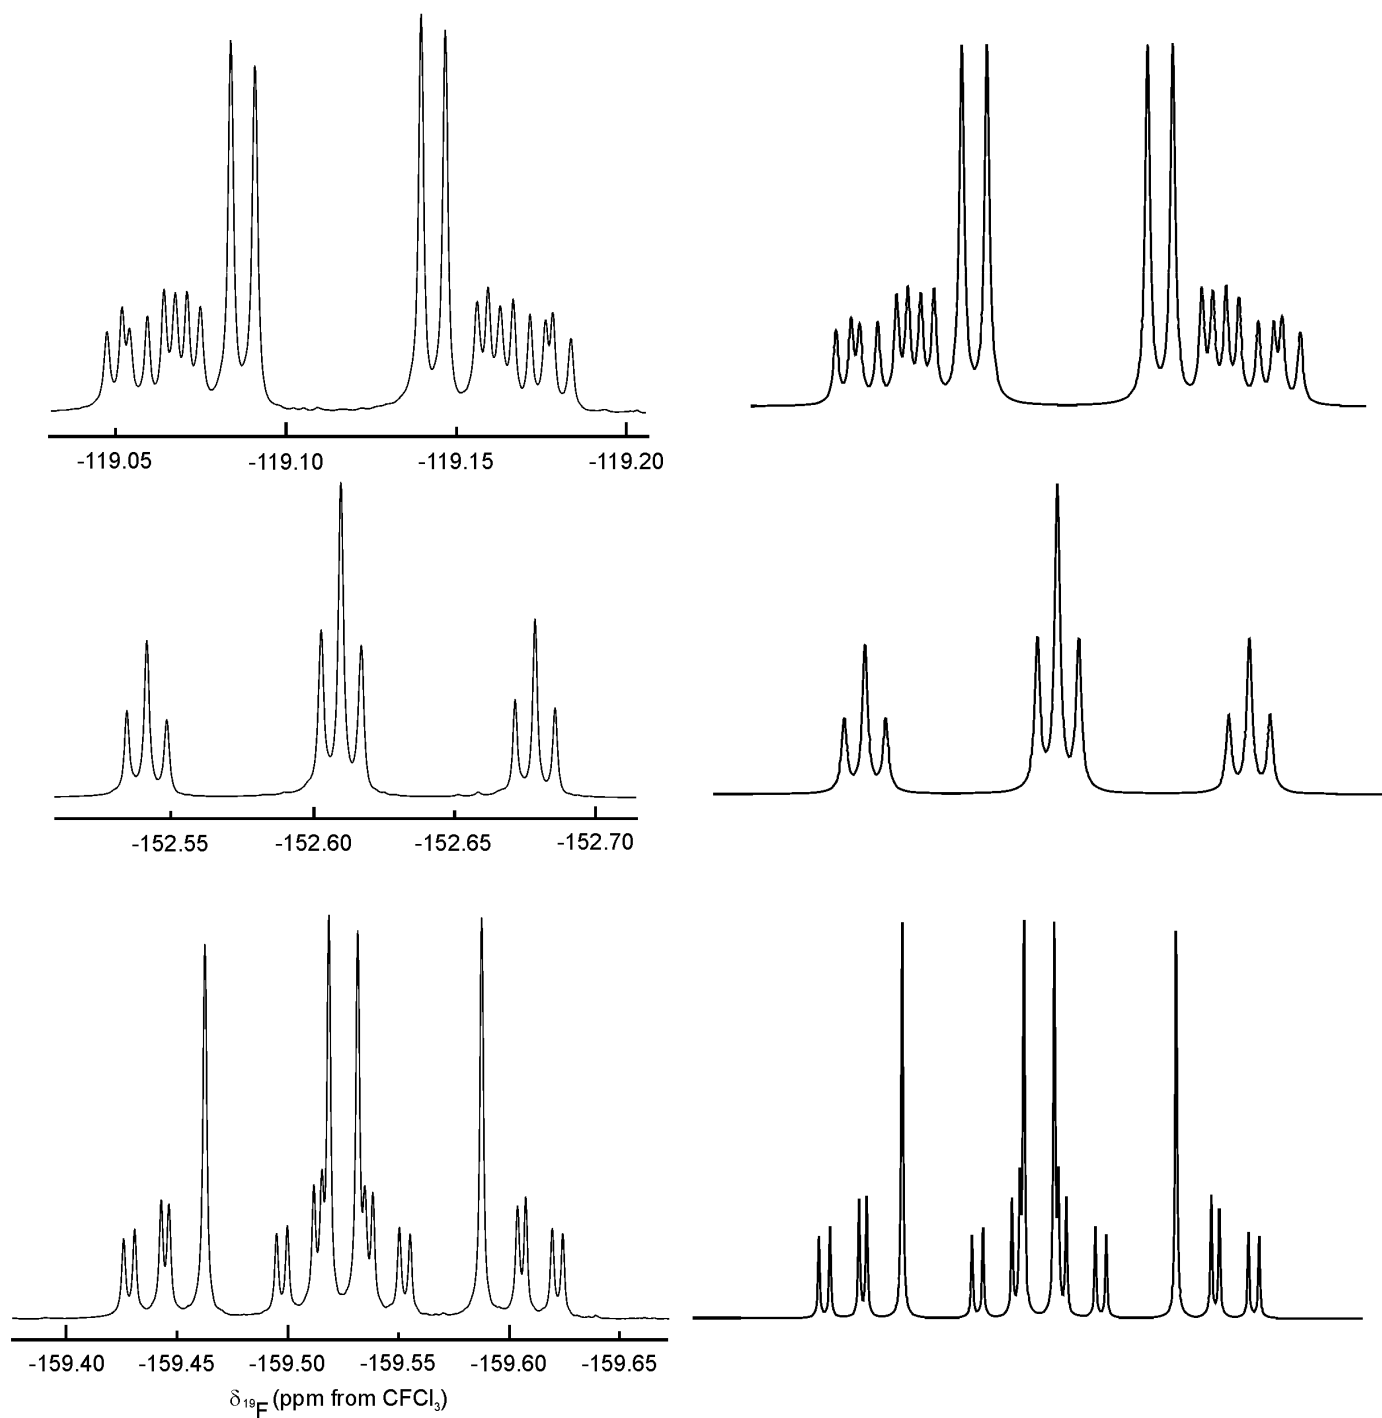

**Figure S1.** The  $^{19}\text{F}$  NMR spectra (282.40 MHz) of the *o*-, *m*- and *p*- $\text{C}_6\text{F}_5$  fluorine resonances of  $\text{C}_6\text{F}_5\text{I}$  recorded in  $\text{CD}_3\text{CN}$  at 24  $^\circ\text{C}$ ; spectra were resolution enhanced by Gaussian multiplication (left-hand traces). The simulated spectra (right-hand traces) are provided for comparison.

**Synthesis of  $B(C_6F_5)_3$ .** Pentafluorophenyl magnesium bromide was prepared in a three-neck round bottom flask (250 mL) equipped with a reflux condenser and a dropping funnel. Bromopentafluorobenzene (25.46 g; 103.1 mmol) was diluted with  $Et_2O$  (40 mL) and added dropwise within 20 min to magnesium turnings (3.40 g; 140 mmol) in dry  $Et_2O$  (60 mL) at the reflux temperature ( $-35\text{ }^{\circ}C$ ) and stirred for 70 min. The completion of the reaction was confirmed by  $^{19}F$  NMR spectroscopy. In a second round bottom flask, freshly distilled  $BF_3 \cdot Et_2O$  (4.8 g; 31 mmol) was diluted in  $Et_2O$  (10 mL), cooled to  $-78\text{ }^{\circ}C$  and transferred to the cold ( $-78\text{ }^{\circ}C$ ) Grignard suspension within 5–10 min by means of a 1.5 mm o.d. PTFE tube. The suspension was initially stirred for 15 min at  $-60\text{ }^{\circ}C$  and for 45 min at  $0\text{ }^{\circ}C$ , and then allowed to warm to room temperature and stirred for a further 3.5 h until all  $C_6F_5MgBr$  had reacted, yielding  $B(C_6F_5)_3$ . The completion of the reaction was confirmed by NMR spectroscopy and the solvent was subsequently removed under dynamic vacuum. The crude, brown and sticky solid was extracted three times with boiling ( $69\text{ }^{\circ}C$ ) *n*-hexane (75 mL portions). The hexane solutions were combined and stored at room temperature. Over time, clear, colorless crystals (2–4 mm) of  $B(C_6F_5)_3$  grew. The  $B(C_6F_5)_3$  crystals (9.78 g; 19.10 mmol; 61.9%) were isolated, dried, and sublimed under dynamic vacuum at  $100\text{--}110\text{ }^{\circ}C$  onto a water-cooled cold-finger. The cold-finger was dried and transferred into a drybox where  $B(C_6F_5)_3$  (6.73; 13.14 mmol; 42.6%) was recovered.

**Synthesis of  $Cs[B(C_6F_5)_4]$ .** Bromopentafluorobenzene (1.783 g; 7.22 mmol) was dissolved in  $Et_2O$  (25 mL) and cooled to  $-80\text{ }^{\circ}C$ . A butyllithium/*n*-pentane solution (2.5 M; 5 mL; 12.50 mmol) was added dropwise at  $-80\text{ }^{\circ}C$  and stirred for 2 h. The reaction was monitored until complete by  $^{19}F$  NMR spectroscopy. A sample was solvolyzed with  $CH_3OH$  (250 mL) at  $-40\text{ }^{\circ}C$  and the amount of  $C_6F_5H$  determined by integration of the  $^{19}F$  NMR spectrum against the internal standard, benzotrifluoride, (10.0  $\mu L$ ; 0.082 mmol). Lithium pentafluorobenzene is unstable in  $Et_2O$  at temperatures higher than  $-20\text{ }^{\circ}C$  and must be handled at low temperatures.

In a second round bottom flask,  $B(C_6F_5)_3$  (2.896 g; 5.66 mmol) was suspended in *n*-pentane (50 mL) and cooled to  $-80\text{ }^{\circ}C$ . The  $C_6F_5Li/Et_2O/n$ -pentane solution was transferred to the  $B(C_6F_5)_3/n$ -pentane suspension through a 1.5-mm o.d. Teflon tube and the mixture stirred for 15 min at  $-60\text{ }^{\circ}C$ , 60 min at  $-40\text{ }^{\circ}C$  and 30 min at room temperature whereupon a white solid precipitated. The mother liquor was separated and the solid washed three times (20 mL each) with *n*-pentane. All solutions were combined and checked by  $^{19}F$  NMR spectroscopy and showed no signals. The white solid,  $[Li(Et_2O)_x][B(C_6F_5)_4]$ , was dried under vacuum for 8 h at room temperature. The solid was dissolved in  $H_2O$  (30 mL) and the  $H_2O$  was subsequently removed under vacuum. This treatment was repeated twice to remove coordinated  $Et_2O$ . A vacuum dried (room temperature, 2 h) white solid corresponding to  $[Li(H_2O)_x][B(C_6F_5)_4]$  (3.42 g, 5 mmol; yield 88%, calculated for one molecule of  $H_2O$ ) was isolated.

$[Li(H_2O)_x][B(C_6F_5)_4]$  (3.02 g; 4.30 mmol) was dissolved in water (50 mL) and combined with a saturated solution of  $CsOH \cdot H_2O$  (1.854 g; 11.00 mmol) in  $H_2O$  (40 mL), whereupon a white precipitate immediately formed. The suspension was stirred for 2 h at room temperature and the mother liquor was separated. The solid was washed with  $H_2O$  until the pH was neutral. The white solid was dried under vacuum for 6 h at room temperature, yielding 2.777 g; 3.42 mmol of  $Cs[B(C_6F_5)_4]$  (80% yield).
